# Supplementary material
Source: PubMed Central journal article supplement (PMC4318735)
Supplement: 10-1055-s-0034-1383419-sup_gf862.pdf [file 10-1055-s-0034-1383419-sup_gf862.pdf]

# Nikotinkonsum während der Schwangerschaft als Risikofaktor für Defizite in exekutiven Funktionen im Kindergartenalter

## Smoking during Pregnancy Is a Risk Factor for Executive Function Deficits in Preschool-aged Children

**Autoren** M. Daseking, F. Petermann, T. Tischler, H.-C. Waldmann

**Institut** Zentrum für Klinische Psychologie und Rehabilitation, Universität Bremen, Bremen

### Schlüsselwörter

- Nikotin
- Schwangerschaft
- exekutive Funktionen
- ADHS
- BRIEF-P

### Key words

- nicotine
- pregnancy
- executive functions
- ADHD
- BRIEF-P

**eingereicht** 20.6.2014  
**revidiert** 11.11.2014  
**akzeptiert** 12.11.2014

### Bibliografie

**DOI** <http://dx.doi.org/10.1055/s-0034-1383419>  
 Geburtsh Frauenheilk 2015; 75: 1–9 © Georg Thieme Verlag KG  
 Stuttgart · New York ·  
 ISSN 0016-5751

### Korrespondenzadresse

**PD Dr. Monika Daseking**  
 Universität Bremen  
 Zentrum für Klinische  
 Psychologie und Rehabilitation  
 Grazer Straße 6  
 28359 Bremen  
 daseking@uni-bremen.de

### Zusammenfassung

**Einleitung:** Der Nikotinkonsum der Mutter während der Schwangerschaft hat verschiedene negative Folgen für ein Kind. Eine Vielzahl von Studien zeigt dabei auch einen Zusammenhang mit psychischen Verhaltensauffälligkeiten auf. In der vorliegenden Studie soll der Fokus auf Störungen in den exekutiven Funktionen im Kindergartenalter gelegt werden.

**Methoden:** Es wurden die Eltern- und Erzieher-einschätzungen zu exekutiven Funktionen im Verhaltensinventar zur Beurteilung exekutiver Funktionen für das Kindergartenalter (BRIEF-P) von 71 Kindergartenkindern, deren Mütter während der Schwangerschaft geraucht haben, mit einer Kontrollgruppe verglichen. Für einen Teil der Kinder von Raucherinnen (n = 42) und von Nichtraucherinnen (n = 27) konnten darüber hinaus die Erzieherinneneinschätzungen im BRIEF-P berücksichtigt werden.

**Ergebnisse:** Im Elternurteil ergab sich für Kinder von Raucherinnen ein gehäuftes Auftreten von Auffälligkeiten in den exekutiven Funktionen. Insbesondere im Bereich der Inhibition zeigten sich fast 4-mal häufiger klinisch relevante Defizite als für die Kinder der Kontrollgruppe (p = 0,006). Die Auffälligkeiten in der Inhibition zeigten sich sowohl im Eltern- als auch im Erzieherurteil.

**Diskussion:** Die hier beschriebene erhöhte Rate an Defiziten in den exekutiven Funktionen, insbesondere im Bereich der Inhibition, bestätigt den Forschungsstand zum Nikotinkonsum während der Schwangerschaft. Mangelnde Inhibition bzw. Impulskontrolle stellt ein Kernsymptom der ADHS dar.

### Abstract

**Introduction:** Maternal nicotine use during pregnancy has a negative impact on the child. Numerous studies have demonstrated an association between smoking during pregnancy and psychological deficits. This study looks at deficits in executive functioning in preschool-aged children.

**Methods:** The executive functioning of preschool children was assessed by asking parents to complete the parental form of the Behavior Rating Inventory of Executive Functions – Preschool Version (BRIEF-P, German version). The results for preschool children whose mothers had smoked during pregnancy (n = 71) were compared with those of a control group. In a subsample, parental assessments of children of smokers (n = 42) and non-smokers (n = 27) were complemented by the teacher form of the BRIEF-P (German version), which allowed inter-rater agreement (parents vs. preschool teachers) to be assessed.

**Results:** An increased incidence of executive function deficits was noted in the children of smokers, based on parental assessment. Clinically relevant deficits were particularly evident with regard to inhibition, with inhibitory deficits in children of smokers found to be almost four times higher than in the control group (p = 0.006). Inhibitory deficits were reported both by parents and by preschool teachers.

**Discussion:** The increased percentage of executive function deficits described here, particularly the increased inhibitory deficits, confirms the current state of research on smoking during pregnancy. Poor inhibition or impulse control is a key symptom of ADHD.

## Einleitung

▼ Mit verschiedenen Maßnahmen wurde in den letzten Jahren in Deutschland versucht, den Tabakkonsum und den Anteil der rauchenden Bevölkerung zu reduzieren. Dennoch zeigt sich v. a. die Prävalenz bei den Raucherinnen mit 29,3% als stabil. Dabei liegt der Anteil der regelmäßig rauchenden Frauen in der Altersgruppe von 18 bis 29 Jahren mit 29,7% am höchsten, weitere 10,3% dieser Altersgruppe geben an, gelegentlich zu rauchen. Darüber hinaus zeigt sich, dass Rauchen mit dem Sozialstatus korreliert: Frauen mit niedrigerem Sozialstatus zählen deutlich häufiger zu den Raucherinnen [1]. Zudem sind 10% der Nichtraucherinnen im häuslichen Umfeld regelmäßig Nikotin ausgesetzt [2]. Und selbst eine Schwangerschaft scheint viele Frauen nicht davon abzuhalten, weiter zu rauchen: mind. 11–13% aller schwangeren Frauen in Deutschland gaben an, mind. eine Zigarette täglich zu rauchen, wobei auch hier ein entsprechender Zusammenhang zum sozioökonomischen Status und zum Alter festzustellen ist [3–5].

Viele Studien zeigen, dass Nikotinkonsum während der Schwangerschaft zahlreiche negative Folgen sowohl für die werdende Mutter als auch für das ungeborene Kind nach sich ziehen [6,7]. Bei den werdenden Müttern verursacht der Nikotinkonsum neben verschiedenen Schwangerschaftskomplikationen wie u. a. vorzeitiger Plazentaablösung, Bluthochdruck, Früh- oder Totgeburt langfristig auch Unfruchtbarkeit (vgl. dazu zusammenfassend [8]). Für das ungeborene Kind bedeutet der mütterliche Nikotinkonsum ein erhöhtes Risiko für eine intrauterine Wachstumsrestriktion (niedriges Geburtsgewicht, geringe Körperlänge) [9,10] und für langfristige gesundheitliche Schäden (vgl. dazu zusammenfassend [8]); aber v. a. auch die kognitive und verhaltensbezogene Entwicklung zeigen sich als beeinträchtigt [6,11]. Dabei werden häufig externalisierende Verhaltensprobleme wie ADHS (Aufmerksamkeitsdefizit-/Hyperaktivitätsstörung [12,13] oder Einschränkungen in den exekutiven Funktionen [14,15] berichtet. Clifford, Lang und Chen [16] konnten über ein systematisches Literaturreview zudem verdeutlichen, dass ähnliche Effekte auf die kindliche Entwicklung auch dann nachgewiesen werden können, wenn die werdende Mutter nur passiv raucht.

Unter dem Begriff „Exekutivfunktionen“ werden verschiedene höhere kognitive Prozesse zusammengefasst, die eine Person dazu befähigen, sich flexibel an neue und komplexe Aufgaben anzupassen und entsprechende Handlungen selbstständig zu regulieren. Dazu werden Fähigkeiten wie Inhibitionskontrolle, Handlungsplanung, flexibler Wechsel in der Aufmerksamkeitssteuerung, Erkennen und Korrigieren von Fehlern oder die Unanfälligkeit gegenüber Interferenzen gezählt [17]. Als Kernkompetenzen werden dabei häufig Leistungen des Arbeitsgedächtnisses, der Inhibitionskontrolle und der kognitiven Flexibilität benannt [18]. Es liegen verschiedene Studien über die Entwicklung exekutiver Funktionen im Kindesalter vor, die zudem belegen, dass es sich um ein mehrdimensionales Konstrukt handelt (zusammenfassend s. [19]). Es zeigt sich dabei nicht nur, dass exekutive Funktionen im Zusammenspiel biologischer Reifungsprozesse und Umwelterfahrungen einen Zusammenhang zur Schulbereitschaft und zum Schulerfolg aufweisen [20], sondern auch, dass der sozioökonomische Status einen bedeutenden Einfluss auf die Entwicklung dieser kognitiven Fähigkeiten ausübt [18,21].

In dieser Studie soll der Frage nachgegangen werden, ob sich bereits im Vorschulalter Auswirkungen des Nikotinkonsums der Mutter während der Schwangerschaft auf die exekutiven Funktionen auffinden lassen und welcher Zusammenhang dabei zum

sozioökonomischen Hintergrund der Familie besteht. Zudem soll geprüft werden, wie gut Eltern- und Erzieherperspektive in den Verhaltensbeschreibungen übereinstimmen.

## Methode

### ▼ Eingesetzte Instrumente

Das Verhaltensinventar zur Beurteilung exekutiver Funktionen für das Kindergartenalter (BRIEF-P, [22]) stellt die deutschsprachige Adaptation des Behavior Rating Inventory of Executive Function® – Preschool Version von Gioia, Espy und Isquith [23] dar. Dieser Fragebogen wird durch Bezugspersonen des Kindes (Eltern, Erzieher) ausgefüllt. BRIEF-P beinhaltet 63 Aussagen über Verhaltensweisen junger Kinder, die sich mit dem Konzept der exekutiven Funktionen zusammenfassen lassen. Die Bezugspersonen sollen dabei auf einer 3-stufigen Skala („nie“, „manchmal“, „oft“) einschätzen, ob bestimmte Verhaltensweisen (z. B.: Be kommt Wutanfälle, wenn zum ihm „nein“ gesagt wird.) in den letzten 6 Monaten ein Problem dargestellt haben. Aus den Bewertungen lassen sich die Ausprägungen von Verhaltensweisen in 5 primären Bereichen bestimmen (Inhibition, Aufmerksamkeitswechsel, Emotionale Kontrolle, Arbeitsgedächtnis, Planen/Organisieren), aus denen wiederum 3 Indizes (Inhibitorische Selbstkontrolle, Flexibilität, Metakognitive Entwicklung) und ein Gesamtwert *Exekutive Funktionen* gebildet werden. Die Zuordnung der primären Skalen des BRIEF-P zu den Indizes und zum Gesamtwert wird aus **Abb. 1** deutlich. Für den Gesamtwert werden die Rohwertsummen der 5 Untertests in einen T-Wert ( $M = 50$ ,  $SD = 10$ ) überführt. Die Indexwerte setzen sich aus je 2 Untertests zusammen, wobei der Untertest Emotionale Kontrolle sowohl in den Index Inhibitorische Selbstkontrolle als auch Flexibilität einfließt.

Die interne Konsistenz für das Elternurteil beträgt für den Gesamtwert des BRIEF-P  $\alpha = 0,95$  und für das Erzieherurteil  $\alpha = 0,96$ . Für BRIEF-P liegen geschlechts- und altersgruppenspezifische T-Wert-Normen für Kinder von 2;0 bis 6;11 Jahren vor.

Darüber hinaus wurde ein Elternfragebogen vorgelegt, in dem u. a. Angaben zu Schwangerschaft, Geburt und zur Entwicklung des Kindes erfragt sowie der sozioökonomische Hintergrund der Familie erhoben wurden.

### Studienpopulation

Alle Daten wurden im Rahmen der deutschsprachigen Normierung des Verhaltensinventars zur Beurteilung exekutiver Funktionen für das Kindergartenalter (BRIEF-P) [22] erhoben. Die Datenerhebung fand 2012–2013 unter Federführung des Zentrums für Klinische Psychologie und Rehabilitation (ZKPR) der Universität Bremen in Kindertageseinrichtungen in 6 Bundesländern der BRD statt. Dort wurden vor Ort durch Kooperationspartner des ZKPR Kindergärten kontaktiert und Informationsmaterialien an Erzieherinnen und Eltern verteilt. Dabei gaben die Eltern auch ihr Einverständnis, die Angaben aus einem Fragebogen zum sozioökonomischen Hintergrund der Familie und zur frühkindlichen Entwicklung des Kindes nutzen sowie eine Verhaltenseinschätzung durch die Erzieherinnen im Kindergarten einbeziehen zu können.

In die nachfolgenden statistischen Analysen wurden die Eltern-einschätzungen im BRIEF-P von  $n = 71$  Kindern (Jungen:  $n = 35$ , 49,3%; Mädchen:  $n = 36$ , 50,7%) einbezogen, deren Mütter im zusätzlichen Elternfragebogen zur Entwicklung ihres Kindes und zum sozioökonomischen Hintergrund der Familie angegeben

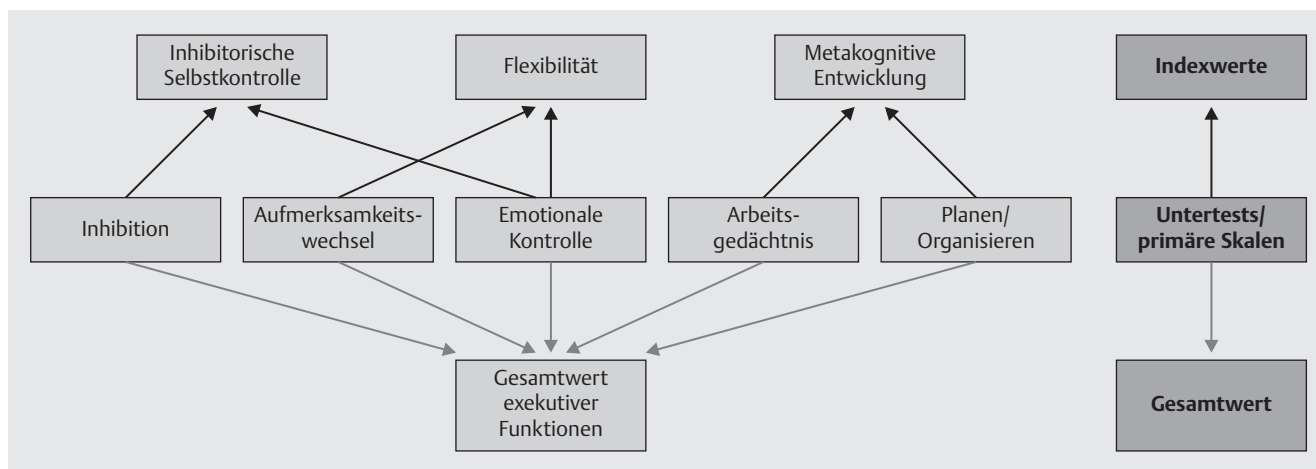

Abb. 1 Zusammenführung der primären Skalen des BRIEF-P in 3 Indexwerte und den Gesamtwert.

hatten, während der Schwangerschaft geraucht zu haben. Dieser Studienpopulation wurden  $n = 71$  Kinder aus der Normstichprobe des BRIEF-P anhand der Merkmale Alter und Geschlecht des Kindes sowie Bildungsabschluss der Mutter zugeordnet, deren Mütter während der Schwangerschaft nicht geraucht haben. Für  $n = 69$  Kinder ( $n = 42$  Kinder von Raucherinnen,  $n = 27$  Kinder von Nichtraucherinnen) liegen zusätzlich zum Elternurteil auch die Einschätzungen der Erzieherinnen der betreuenden Kindertageseinrichtung zu den exekutiven Funktionen vor, die mit der Erzieherversion des BRIEF-P erhoben wurden.

### Statistische Analysen

Gruppenunterschiede wurden mittels t-Tests auf Signifikanz geprüft. Zusätzlich wurde als Effektstärke für Mittelwertdifferenzen bei gleichen Studienpopulationsgrößen Cohen's  $d$  bestimmt. Im BRIEF-P werden T-Werte  $> 65$  als auffällig interpretiert. Für Häufigkeitsanalysen wurden die T-Werte daher klassiert ( $\leq 65 = 0 =$  unauffällig,  $> 65 = 1 =$  auffällig). Zur Berechnung des Risikos wurde das Odds Ratio bestimmt und mit dem Konfidenzintervall auf dem 95%-Niveau angegeben. Um die Signifikanz von Hypothesen zu den Kreuztabellen zu prüfen, wurden Chi-Quadrat-Tests berechnet.

Zusätzlich wurde der Zusammenhang zwischen Eltern- und Erzieherurteil im BRIEF-P geprüft. Dafür wurden zunächst für beide Gruppen getrennt Produkt-Moment-Korrelationen nach Pearson berechnet. Die Differenzen zwischen Korrelationskoeffizienten beider Gruppen bezogen auf Untertests, Skalen und Gesamtwert wurden über Fisher-z-Transformation auf Signifikanz geprüft. Anschließend wurden die paarweisen Korrelationskoeffizienten gepoolt. Alle Analysen wurden mit SPSS 20 durchgeführt.

### Ergebnisse

#### Beschreibung der Studienpopulation

Beschreibungsmerkmale der Studienpopulation können den **Tab. 1** (Merkmale der Mutter) und **2** (Merkmale des Kindes) entnommen werden.

Für die Merkmale Bildungsabschluss der Mutter ( $\chi^2 = 0,795$ ,  $df = 2$ ,  $p = 0,672$ ) und Alter des Kindes ( $t = -0,012$ ,  $df = 140$ ,  $p = 0,990$ ) ergeben sich durch das Matching für die beiden Gruppen (Raucherinnen vs. Nichtraucherinnen) ähnliche Verteilun-

gen. Dagegen erweist sich die Verteilung des Merkmals Familieneinkommen zwischen Raucherinnen und Nichtraucherinnen als signifikant verschieden. Mehr als 75% der Raucherinnen haben monatlich ein Familieneinkommen von weniger als 2500 Euro zur Verfügung; in der Kontrollgruppen trifft dies nur auf 45% der Familien zu. Es besteht ebenfalls ein signifikanter Unterschied für den Familienstatus:  $n = 24$  (33,8%) Raucherinnen sind nach eigenen Angaben alleinerziehend, aber nur  $n = 12$  (16,9%) Frauen, die angegeben haben nicht zu rauchen, leben ohne einen Partner. Daraus ergibt sich ein ebenfalls signifikanter Zusammenhang zwischen Familieneinkommen und Familienstatus: die alleinerziehenden Mütter verfügen häufiger über ein niedrigeres Einkommen ( $\chi^2 = 17,957$ ,  $df = 3$ ,  $p = 0,000$ ).

Die Raucherinnen wurden weiter dazu befragt, wie viele Zigaretten sie während der Schwangerschaft täglich konsumiert haben und ob bzw. wann sie ggf. mit dem Rauchen aufgehört hätten. Demnach ergibt sich, dass 61,2% der Frauen dieser Gruppe über den gesamten Zeitraum der Schwangerschaft hinweg geraucht haben. Diejenigen Frauen, die das Rauchen während der Schwangerschaft aufgegeben haben, haben dies im Mittel zum Ende des 3. Schwangerschaftsmonats getan ( $SD = 1,9$ ). Im Durchschnitt wurden 8,6 Zigaretten täglich konsumiert ( $SD = 7,3$ ,  $Min = 1$ ,  $Max = 30$ ,  $Median = 5$ ). Zwei Raucherinnen und 1 Nichtraucherin haben darüber hinaus angegeben, zu einer besonderen Gelegenheit auch Alkohol getrunken zu haben.

Im Elternfragebogen zur Entwicklung der Kinder und zum sozioökonomischen Hintergrund der Familie haben 6 von 71 Müttern (= 8,5%), die während der Schwangerschaft geraucht haben, weiterhin angegeben, dass ihr Kind an Asthma oder einer anderen chronischen Bronchialerkrankung leidet. Damit besteht für Kinder von Raucherinnen eine um 3,2 erhöhte Chance ( $OR = 3,2$ ,  $95\%-KI = 0,62-16,35$ ), eine chronische Erkrankung der Atemwege zu entwickeln. Der Unterschied zu den Kindern von nicht rauchenden Müttern fällt jedoch in der Häufigkeitsverteilung des Auftretens ( $n = 2$ ; 2,8%) nicht signifikant aus ( $\chi^2 = 2,119$ ,  $df = 1$ ,  $p = 0,145$ ). Für das Geburtsgewicht zeigt sich, dass die Kinder der Raucherinnen ( $M = 3240,0$ ,  $SD = 526,0$ ) im Mittel zwar um 125 Gramm leichter waren als die Kinder der Nichtraucherinnen ( $M = 3365,0$ ,  $SD = 551,7$ ), dieser Unterschied ist jedoch ebenfalls als statistisch nicht signifikant zu bewerten (vgl. **Tab. 2**). Weitere Fragen zur Beschreibung von Schwangerschaft und Geburt ergaben zwischen beiden Gruppen keine Unterschiede in den Be-

**Tab. 1** Studienpopulationsbeschreibung: Merkmale der Kindsmutter.

|                              | Kinder von Raucherinnen<br>(n = 71) |      | Kinder von Nicht-<br>raucherinnen (n = 71) |      | $\chi^2$ | df | p     |
|------------------------------|-------------------------------------|------|--------------------------------------------|------|----------|----|-------|
|                              | n                                   | %    | n                                          | %    |          |    |       |
| Bildungsabschluss der Mutter |                                     |      |                                            |      | 0,795    | 2  | 0,672 |
| ▶ kein Abschluss/Hauptschule | 29                                  | 40,8 | 26                                         | 36,6 |          |    |       |
| ▶ Realschule/POS             | 31                                  | 43,7 | 30                                         | 42,3 |          |    |       |
| ▶ (Fach-)Hochschulreife      | 11                                  | 15,5 | 15                                         | 21,1 |          |    |       |
| Familienstand                |                                     |      |                                            |      | 5,358    | 1  | 0,021 |
| ▶ alleinerziehend            | 24                                  | 33,8 | 12                                         | 16,9 |          |    |       |
| Familieneinkommen (in Euro)  |                                     |      |                                            |      | 15,097   | 3  | 0,002 |
| ▶ < 1 000                    | 11                                  | 16,2 | 8                                          | 12,3 |          |    |       |
| ▶ 1 000–2 500                | 41                                  | 60,3 | 21                                         | 32,3 |          |    |       |
| ▶ 2 500–5 000                | 15                                  | 22,1 | 31                                         | 47,7 |          |    |       |
| ▶ > 5 000                    | 1                                   | 1,5  | 5                                          | 7,7  |          |    |       |
| Familienstand X Einkommen    |                                     |      |                                            |      | 17,957   | 3  | 0,000 |

**Anmerkungen:** POS = Polytechnische Oberschule (Schulabschluss der DDR, entspricht Realschulabschluss), t = t-Wert, df = Freiheitsgrade, p = 2-seitiger Signifikanztest

**Tab. 2** Studienpopulationsbeschreibung: Merkmale des Kindes.

|                               | Kinder von Raucherinnen<br>(n = 71) |       | Kinder von Nicht-<br>raucherinnen (n = 71) |       | t        | df  | p     |
|-------------------------------|-------------------------------------|-------|--------------------------------------------|-------|----------|-----|-------|
|                               | M                                   | SD    | M                                          | SD    |          |     |       |
| Alter (in Monaten)            | 57,2                                | 14,4  | 57,2                                       | 13,7  | -0,012   | 140 | 0,990 |
| Geburtsgewicht (in Gramm)     | 3 240,0                             | 526,0 | 3 365,0                                    | 551,7 | 1,372    | 140 | 0,172 |
|                               | n                                   | %     | n                                          | %     | $\chi^2$ | df  | p     |
| chronische Atemwegserkrankung | 6                                   | 8,5   | 2                                          | 2,8   | 2,119    | 1   | 0,145 |

**Anmerkungen:** t = t-Wert, df = Freiheitsgrade, p = 2-seitiger Signifikanztest

**Tab. 3** Unterschiede in den Elterneinschätzungen im BRIEF-P zu exekutiven Funktionen zwischen Kindern von Raucherinnen und Nichtraucherinnen.

|                        | Kinder von Nicht-<br>raucherinnen (n = 71) |      | Kinder von Raucherinnen<br>(n = 71) |      | Diff | t      | df  | p     | d     |
|------------------------|--------------------------------------------|------|-------------------------------------|------|------|--------|-----|-------|-------|
|                        | M                                          | SD   | M                                   | SD   |      |        |     |       |       |
| Inhibition             | 50,4                                       | 9,5  | 55,0                                | 10,1 | -4,6 | -2,777 | 140 | 0,006 | -0,45 |
| Aufmerksamkeitswechsel | 49,0                                       | 9,5  | 50,5                                | 11,0 | -1,5 | -0,865 | 140 | 0,388 | -0,14 |
| Emotionale Kontrolle   | 48,9                                       | 10,1 | 51,5                                | 10,5 | -2,6 | -1,519 | 140 | 0,131 | -0,25 |
| Arbeitsgedächtnis      | 51,2                                       | 10,2 | 53,7                                | 10,7 | -2,5 | -1,416 | 140 | 0,159 | -0,23 |
| Planen/Organisieren    | 50,4                                       | 10,5 | 52,6                                | 10,1 | -2,2 | -1,281 | 140 | 0,202 | -0,22 |
| ISK                    | 50,0                                       | 9,1  | 54,2                                | 10,0 | -4,2 | -2,608 | 140 | 0,010 | -0,42 |
| FLE                    | 48,8                                       | 9,6  | 51,3                                | 10,7 | -2,5 | -1,437 | 140 | 0,153 | -0,23 |
| MKE                    | 51,2                                       | 10,2 | 53,4                                | 10,4 | -2,3 | -1,305 | 140 | 0,194 | -0,22 |
| GEF                    | 50,3                                       | 10,1 | 53,8                                | 10,1 | -3,5 | -2,060 | 140 | 0,041 | -0,34 |

**Anmerkungen:** ISK = Inhibitorische Selbstkontrolle, FLE = Flexibilität, MKE = Metakognitive Entwicklung, GEF = Gesamtwert Exekutive Funktionen, Diff = Mittelwertdifferenz, t = t-Wert, df = Freiheitsgrade, p = zweiseitiger Test, aufgrund der Analysen von Index- und Gesamtwerten auf Basis der Subskalen hier ohne Adjustierung des Signifikanzniveaus für multiples Testen, d = Effektstärke

wertungen. Auch für die Meilensteine der frühkindlichen Entwicklung (hier insbesondere Spracherwerb) konnten keine Gruppenunterschiede festgestellt werden.

### Defizite in exekutiven Funktionen bei Kindern von Raucherinnen liegen besonders im Bereich der Verhaltenshemmung

Wie **Tab. 3** entnommen werden kann, ergibt der Vergleich der Mittelwerte zu den Elterneinschätzungen im BRIEF-P eine signifikante Differenz für die primäre Skala *Inhibition* ( $t = -2,777$ ,  $df = 140$ ,  $p = 0,006$ ). Die standardisierte Mittelwertdifferenz kann mit  $d = -0,45$  als mittlerer Effekt interpretiert werden. Die Mittelwertdifferenzen für die übrigen 4 primären Skalen fallen nicht

signifikant aus. Für die übergeordneten Indexwerte erreicht die Mittelwertdifferenz für die *Inhibitorische Selbstkontrolle* mit  $p = 0,010$  ( $t = 2,608$ ,  $df = 140$ ) statistische Signifikanz. In diesen Index fließen die beiden primären Skalen *Inhibition* und *Emotionale Kontrolle* ein (vgl. **Abb. 1**). Die Effektstärke liegt mit  $d = -0,42$  wiederum im mittleren Bereich. Auch für den Gesamtwert *Exekutive Funktionen* ergibt sich eine signifikante Mittelwertdifferenz ( $t = -2,060$ ,  $df = 140$ ,  $p = 0,041$ ), wobei die Effektstärke mit  $d = -0,34$  kleiner ausfällt als für die beiden oben genannten Differenzen. In den Gesamtwert fließen alle 5 primären Skalen ein. Im klinischen Kontext werden T-Werte  $> 65$  als auffällig interpretiert. Eine entsprechende Zuordnung der T-Werte zu den Kategorien „auffällig“ oder „unauffällig“ ergab für fast alle Bereiche (pri-

**Tab. 4** Häufigkeiten klinisch relevanter Bewertungen (T-Wert > 65) im BRIEF-P von Kindern von Raucherinnen und Nichtraucherinnen.

|                        | Kinder von Nicht-raucherinnen (n = 71) |     | Kinder von Raucherinnen (n = 71) |      | $\chi^2$ | p     | OR   | KI (95%) |       |
|------------------------|----------------------------------------|-----|----------------------------------|------|----------|-------|------|----------|-------|
|                        | n                                      | %   | n                                | %    |          |       |      |          |       |
| Inhibition             | 4                                      | 5,6 | 13                               | 18,3 | 5,413    | 0,020 | 3,75 | 1,16     | 12,15 |
| Aufmerksamkeitswechsel | 2                                      | 2,8 | 7                                | 9,9  | 2,966    | 0,085 | 3,77 | 0,76     | 18,84 |
| Emotionale Kontrolle   | 6                                      | 8,5 | 5                                | 7,0  | 0,099    | 0,754 | 0,8  | 0,24     | 2,82  |
| Arbeitsgedächtnis      | 7                                      | 9,9 | 9                                | 12,7 | 0,282    | 0,596 | 1,3  | 0,47     | 3,78  |
| Planen/Organisieren    | 7                                      | 9,9 | 7                                | 9,9  | 0,000    | 1,000 | 1,0  | 0,33     | 3,01  |
| ISK                    | 4                                      | 5,6 | 11                               | 15,5 | 3,652    | 0,056 | 3,1  | 0,93     | 10,16 |
| FLE                    | 4                                      | 5,6 | 6                                | 8,5  | 0,430    | 0,512 | 1,6  | 0,42     | 5,73  |
| MKE                    | 7                                      | 9,9 | 9                                | 12,7 | 0,282    | 0,596 | 1,3  | 0,47     | 3,78  |
| GEF                    | 5                                      | 7,0 | 12                               | 16,9 | 3,274    | 0,070 | 2,7  | 0,89     | 8,07  |

**Anmerkungen:** ISK = Inhibitorische Selbstkontrolle, FLE = Flexibilität, MKE = Metakognitive Entwicklung, GEF = Gesamtwert Exekutive Funktionen,  $\chi^2$  =  $\chi^2$ -Wert, p = 2-seitiger Signifikanztest, OR = Odds Ratio, KI = Konfidenzintervall

**Tab. 5** Unterschiede in den Erziehereinschätzungen im BRIEF-P zu exekutiven Funktionen zwischen Kindern von Raucherinnen und Nichtraucherinnen.

|                        | Kinder von Nicht-raucherinnen (n = 27) |      | Kinder von Raucherinnen (n = 42) |      | Diff | t      | df | p     | d     |
|------------------------|----------------------------------------|------|----------------------------------|------|------|--------|----|-------|-------|
|                        | M                                      | M    | M                                | SD   |      |        |    |       |       |
| Inhibition             | 51,0                                   | 51,0 | 55,2                             | 11,2 | -4,2 | -1,511 | 67 | 0,135 | -0,38 |
| Aufmerksamkeitswechsel | 52,2                                   | 52,2 | 50,2                             | 9,7  | 2,0  | 0,837  | 67 | 0,406 | 0,21  |
| Emotionale Kontrolle   | 52,1                                   | 52,1 | 52,3                             | 9,9  | -0,2 | -0,093 | 67 | 0,926 | -0,02 |
| Arbeitsgedächtnis      | 54,0                                   | 54,0 | 54,6                             | 9,6  | -0,6 | -0,226 | 67 | 0,822 | -0,05 |
| Planen/Organisieren    | 54,3                                   | 54,3 | 53,3                             | 9,9  | 1,0  | 0,339  | 67 | 0,736 | 0,09  |
| ISK                    | 51,7                                   | 51,7 | 54,5                             | 11,1 | -2,8 | -1,015 | 67 | 0,314 | -0,25 |
| FLE                    | 52,3                                   | 52,3 | 51,6                             | 9,4  | 0,7  | 0,304  | 67 | 0,762 | 0,07  |
| MKE                    | 54,3                                   | 54,3 | 54,5                             | 9,7  | -0,2 | -0,05  | 67 | 0,960 | -0,02 |
| GEF                    | 53,1                                   | 53,1 | 54,5                             | 10,1 | -1,4 | -0,516 | 67 | 0,608 | -0,13 |

**Anmerkungen:** ISK = Inhibitorische Selbstkontrolle, FLE = Flexibilität, MKE = Metakognitive Entwicklung, GEF = Gesamtwert Exekutive Funktionen, Diff = Mittelwertdifferenz, t = t-Wert, df = Freiheitsgrade, p = zweiseitiger Test, aufgrund der Analysen von Index- und Gesamtwerten auf Basis der Subskalen hier ohne Adjustierung des Signifikanzniveaus für multiples Testen, d = Effektstärke

märe Skalen, Indizes) mehr auffällige Einschätzungen für die Kinder von Raucherinnen als für die Kinder der Kontrollgruppe (vgl. **Tab. 4**).

Besonders deutlich und gleichzeitig auch signifikant fällt dieser Unterschied wiederum für die Skala *Inhibition* aus: 18,3% (n = 13) der Kinder von Müttern, die während der Schwangerschaft geraucht haben, erreichen in dieser Skala eine klinisch auffällige Beurteilung; dies trifft gleichzeitig aber nur auf 4,6% der Kontrollgruppe (n = 4) zu. Damit weisen Kinder von rauchenden Müttern im Vergleich zur Kontrollgruppe 3,8-mal häufiger Auffälligkeiten im Bereich der *Inhibition* auf (OR = 3,8, 95%-KI = 1,16–12,15). Auch in der primären Skala *Aufmerksamkeitswechsel* ergeben sich mehr auffällige Bewertungen für Kinder von rauchenden Müttern. Das Odds Ratio beträgt ebenfalls 3,8, auch wenn hier nur n = 7 (9,9%) der Kinder als auffällig eingeschätzt werden. Der Unterschied in der Verteilung der Werte wird jedoch nicht signifikant. Für die übergeordnete Skala *Inhibitorische Selbstkontrolle* zeigt sich mit OR = 3,1 ebenfalls ein Chancenverhältnis zulasten der Kinder von Raucherinnen, hier wird die statistische Signifikanz mit p = 0,056 nur knapp verfehlt. Das gilt in ähnlicher Weise auch für den *Gesamtwert Exekutive Funktionen* (OR = 2,7, p = 0,070).

### Das Erzieherurteil zeigt ebenfalls mehr Auffälligkeiten in der Inhibition/Impulskontrolle für Kinder von Raucherinnen

Da nicht für alle Kinder gleichzeitig auch ein Erzieherurteil zur Einschätzung der exekutiven Funktionen vorliegt und die Gruppengrößen bezogen auf Kinder von rauchenden und nicht rauchenden Müttern sich zudem unterscheiden, sind die nachfolgenden Analysen nur eingeschränkt interpretierbar. Es zeigt sich jedoch, dass sowohl für die Mittelwerte als auch für die Verteilung auffälliger T-Werte ein ähnliches Muster zu beobachten ist wie für die Elterneinschätzungen. Alle Analysen fallen jedoch statistisch nicht signifikant aus (vgl. **Tab. 5**).

Auch bei der Erziehereinschätzung wird jedoch deutlich, dass Kinder von Raucherinnen mehr Auffälligkeiten in der primären Skala *Inhibition* zeigen als die Kinder der Nichtraucherinnen. Die Mittelwertdifferenz zwischen beiden Gruppen liegt mit knapp einer halben Standardabweichung in einem ähnlichen Bereich wie die Differenz der Mittelwerte im Elternurteil (Differenz Elternurteil = 4,6 vs. Differenz Erzieherurteil = 4,2).

### Eltern- und Erzieherurteil zu exekutiven Funktionen weisen mittlere bis hohe Übereinstimmung auf

Da für eine Teilstudienpopulation auch eine Einschätzung der exekutiven Funktionen durch die betreuenden Erzieherinnen vorliegt, lassen sich Aussagen zur Übereinstimmung beider Beurteilungen machen. Die Unterschiede in den Zusammenhangs-

**Tab. 6** Zusammenhang zwischen Eltern- und Erzieherurteil zu exekutiven Funktionen (BRIEF-P).

|                        | Kinder von Raucherinnen<br>(n = 42) |       | Kinder von Nichtraucherinnen<br>(n = 27) |       | p <sup>a</sup> | r <sub>12</sub> <sup>b</sup> | r <sub>n</sub> |
|------------------------|-------------------------------------|-------|------------------------------------------|-------|----------------|------------------------------|----------------|
|                        | r <sub>1</sub>                      | p     | r <sub>2</sub>                           | p     |                |                              |                |
| Inhibition             | 0,51                                | 0,007 | 0,54                                     | 0,000 | 0,879          | 0,53                         | 0,55           |
| Aufmerksamkeitswechsel | 0,34                                | 0,079 | 0,48                                     | 0,002 | 0,518          | 0,43                         | 0,45           |
| Emotionale Kontrolle   | 0,25                                | 0,203 | 0,23                                     | 0,152 | 0,929          | 0,24                         | 0,35           |
| Arbeitsgedächtnis      | 0,78                                | 0,000 | 0,59                                     | 0,000 | 0,162          | 0,67                         | 0,60           |
| Planen/Organisieren    | 0,62                                | 0,001 | 0,35                                     | 0,029 | 0,167          | 0,47                         | 0,49           |
| ISK                    | 0,59                                | 0,001 | 0,55                                     | 0,000 | 0,844          | 0,56                         | 0,52           |
| FLE                    | 0,39                                | 0,046 | 0,36                                     | 0,022 | 0,908          | 0,37                         | 0,43           |
| MKE                    | 0,74                                | 0,000 | 0,54                                     | 0,000 | 0,202          | 0,63                         | 0,58           |
| GEF                    | 0,68                                | 0,000 | 0,53                                     | 0,000 | 0,346          | 0,59                         | 0,56           |

**Anmerkungen:** r = Korrelationskoeffizient, <sup>a</sup> = Signifikanzwert für die Prüfung der Nullhypothese zu beiden Korrelationskoeffizienten, <sup>b</sup> = über Fisher-z-Transformation gepoolte Korrelation zwischen beiden Korrelationskoeffizienten, r<sub>n</sub> = Korrelationskoeffizienten der Normstichprobe, ISK = Inhibitorische Selbstkontrolle, FLE = Flexibilität, MKE = Metakognitive Entwicklung, GEF = Gesamtwert Exekutive Funktionen

maßen zwischen Eltern- und Erzieherurteil, die zunächst getrennt für die beiden Gruppen (Kinder von Raucherinnen vs. von Nichtraucherinnen) berechnet wurden, fallen nicht signifikant aus. Daher kann der Koeffizient verwendet werden, der für die gesamte Studienpopulation (N = 142) berechnet wurde. Mit Ausnahme der primären Skala *Emotionale Kontrolle* ergeben sich mittlere bis hohe lineare Zusammenhänge (vgl. **Tab. 6**), die für die meisten Facetten der exekutiven Funktionen für einen gute Übereinstimmung von Eltern- und Erzieherurteil sprechen. Diese Ergebnisse lassen sich jedoch nur eingeschränkt interpretieren, da nicht für alle Kinder der Studienpopulation Einschätzungen aus beiden Informationsquellen vorliegen.

## Diskussion

Betrachtet man die kognitive und die verhaltensbezogene Entwicklung der Kinder von Raucherinnen, lassen die Ergebnisse dieser Studie darauf schließen, dass sich der mütterliche Nikotinkonsum während der Schwangerschaft negativ auf verschiedene Facetten der exekutiven Funktionen auswirkt. Im Elternurteil werden für die Kinder von rauchenden Müttern in allen Skalen des BRIEF-P höhere T-Wert-Mittelwerte erreicht. Die Differenz zur Gruppe der Kinder von Nichtraucherinnen beträgt bis zu einer halben Standardabweichung (hier v. a. in der primären Skala *Inhibition*). Mit den Fragen, die in der Skala *Inhibition* zusammengefasst sind, wird die Fähigkeit eines Kindes beschrieben, sein Verhalten zu regulieren, also Handlungsimpulse zu unterdrücken oder das eigene Verhalten zu stoppen. Einschränkungen in dieser Fähigkeit werden gleichzeitig als Kerndefizit der Aufmerksamkeitsdefizit-/Hyperaktivitätsstörung beschrieben [24]. Es kann also davon ausgegangen werden, dass eine Beziehung zwischen Nikotinkonsum während der Schwangerschaft, Beeinträchtigungen in den exekutiven Funktionen und einer ADHS besteht, wobei bei einer ADHS nicht alle Facetten der exekutiven Funktionen gleichermaßen beeinträchtigt sein müssen [25]. Die deutlichsten Zusammenhänge zwischen exekutiven Funktionen und ADHS bestehen für die Impulskontrolle, also die Inhibition. Zusammenhänge zwischen den exekutiven Funktionen und der ADHS sind für das Schulalter bereits gut erforscht, für das Vorschulalter liegen weitaus weniger entsprechende Forschungsarbeiten vor. Sonuga-Barke et al. [26] konnten in ihrer Studie mit 160 Kindergartenkindern zeigen, dass in erster Linie für Aufgaben zur Impulskontrolle eine Verbindung zur ADHS nach-

gewiesen werden kann. Für weitere Facetten der exekutiven Funktionen wie Arbeitsgedächtnis oder Handlungsplanung ließen sich hingegen keine bedeutsamen Zusammenhänge finden. Die in der vorliegenden Studie erhobenen Ergebnisse auf der Basis der Eltern- und Erziehereinschätzungen im BRIEF-P weisen in eine ähnliche Richtung. Da sich in beiden Einschätzungen ähnliche Ergebnisse für die Fähigkeit zur Impulskontrolle/Inhibition zeigen, kann zudem geschlossen werden, dass es sich um eine situationsübergreifende Verhaltensproblematik handelt. Damit kann ein weiteres Kriterium für die Diagnosestellung einer ADHS als erfüllt angesehen werden: Symptome sollen in unterschiedlichen Situationen auftreten; sie sollten also, wie hier die mangelnde Fähigkeit zur Inhibition/Impulskontrolle, sowohl zu Hause als auch an einem anderen Ort (in diesem Fall in der Kindertageseinrichtung) beobachtet werden können. Als diagnostisches Kriterium der ADHS gilt ebenfalls, dass die Symptome bereits vor dem 7. Lebensjahr auftreten.

Darüber hinaus konnten Sonuga-Barke und Kollegen [26] einen positiven Zusammenhang zwischen Defiziten in der Inhibition und dem Schweregrad der ADHS aufzeigen. In einer weiteren aktuellen Studie wurden ebenfalls Zusammenhänge zwischen ADHS und Einschränkungen in zentralen Bereichen der exekutiven Funktionen, v. a. aber wiederum in der Inhibition/Impulskontrolle deutlich [27]. Skogan und Kollegen vermuten, dass eine Verbindung zwischen eingeschränkten exekutiven Funktionen und verschiedenen Verhaltensstörungen besteht, wobei sich die Verhaltensprobleme im Schulalter auf der Basis bereits im Vorschulalter erkennbarer defizitärer exekutiver Funktionen entwickeln. In diesem Kontext könnte BRIEF-P als Verfahren genutzt werden, um diese vorschulischen Hinweise auf spätere Verhaltensprobleme zu erkennen.

Roberts, Martel und Nigg [28] konnten belegen, dass Defizite in exekutiven Funktionen dazu herangezogen werden können, Subtypen der ADHS zu unterscheiden und zu beschreiben. Dabei konnten die Autoren 3 Gruppen herausarbeiten, die sich entweder durch (1) niedrige Leistungen in der Fähigkeit zum flexiblen Aufmerksamkeitswechsel oder (2) in der Inhibitionskontrolle bzw. durch (3) unauffällige exekutive Funktionen voneinander abgrenzen.

Wenn man also davon ausgehen kann, dass Defizite in der Inhibition oder Impulskontrolle als Prädiktoren für ADHS anzunehmen sind, dann kann für die vorliegende Studie geschlossen werden, dass für Kinder von Müttern, die während der Schwangerschaft geraucht haben, ein höheres Risiko für eine ADHS besteht

als für Kinder von Nichtraucherinnen. Dieser Zusammenhang bezieht sich in erster Linie auf den Subtyp der ADHS, der mit Defiziten in der Inhibitionskontrolle assoziiert ist.

Mit den vorliegenden Ergebnissen können allerdings keine Aussagen zu einem kausalen Zusammenhang zwischen pränatalen Faktoren wie dem Nikotinkonsum der Mutter während der Schwangerschaft und der nachgeburtlichen Entwicklung der Kinder in verschiedenen Domänen (hier in der defizitären Fähigkeit zur Inhibition als einem Teilbereich der exekutiven Funktionen) getroffen werden. Das Problem liegt auch darin, dass rauchende Mütter oft weitere Risikofaktoren aufweisen, die wiederum die Entwicklung eines Kindes negativ beeinflussen können. Dazu gehört bspw. auch das Ernährungs- oder Gesundheitsverhalten [11]. Es scheint jedoch eine Assoziation zwischen mütterlichem Nikotinkonsum und Auffälligkeiten in der Impulskontrolle des Kindes zu bestehen. Ob aber unmittelbar der Nikotinkonsum für die Defizite verantwortlich zeichnet oder die Auffälligkeiten über eine genetische Disposition [29], weitere Umwelttoxine wie PCB oder Blei [30] oder über Merkmale wie den sozioökonomischen Status der Familie vermittelt werden, wird immer wieder kontrovers diskutiert. Auch Millenet et al. [31] gehen von einer Interaktion zwischen genetischen und verschiedenen Umweltfaktoren bei der Erklärung der ADHS aus. Allerdings wird der über die Mutter vermittelte Kontakt mit Nikotin immer wieder auch mit bedeutsamen neurobiologischen Veränderungen in der vorgeburtlichen Hirnreifung in Verbindung gebracht [32–34], die dann als Basis für kognitive und Verhaltensprobleme benannt werden können. Dwyer und Kollegen [35] stellen umfassend dar, welche Veränderungen Nikotin in der vorgeburtlichen Hirnentwicklung verursacht. Nikotin stimuliert aufgrund seiner Ähnlichkeit mit dem Transmitter Acetylcholin die nikotinergen Acetylcholinrezeptoren, was sich u.a. auf Herzschlag und Blutdruck auswirkt. Indirekt beeinflusst Nikotin aber auch die Anzahl der Nervenzellen im gesamten Gehirn, da es vorzeitig die Phase der Proliferation von Nervenzellen beendet [36]. Zudem beeinflusst Nikotin negativ die Entwicklung dopaminergener Neuronen [37], die wiederum für Bewegungs- und Verhaltenssteuerung verantwortlich zeichnen. Dopamin gilt wiederum als ein wesentlicher Faktor bei der Erklärung der ADHS, wobei die Hypothese als bestätigt gilt, dass bei Patienten mit ADHS eine geringe Dopamindichte im synaptischen Spalt vorliegt (zusammenfassend s. [38]). Auf diesem Hintergrund lassen sich auch die Ergebnisse der vorliegenden Studie einordnen. Bereits im Kindergartenalter, also zu einem frühen Zeitpunkt und vor dem 7. Lebensjahr, zeigen sich sowohl über die Eltern- als auch die Erziehereinschätzungen für Kinder von Müttern, die während der Schwangerschaft geraucht haben, Auffälligkeiten im Bereich der Inhibition. Der frühe Zeitpunkt spricht dabei eher für eine primär biologische Ursache als für nachgeburtliche Einflussfaktoren.

Es ist davon auszugehen, dass sich die Defizite in der Impulskontrolle als Folge des mütterlichen Nikotinkonsums während der Schwangerschaft negativ auf die weitere Entwicklung eines Kindes auswirken. Studien konnten zeigen, dass Defizite in den exekutiven Funktionen im Schulalter zu schwächeren Leistungen in weiteren kognitiven Funktionsbereichen führen (im Überblick [39]).

Als ein medizinischer Nebenbefund der vorliegenden Studienpopulation zeigt sich, dass Kinder von Raucherinnen sowohl ein niedrigeres Geburtsgewicht als auch eine erhöhte Chance für Atemwegserkrankungen aufweisen als die Kinder von Nichtraucherinnen. Diese Unterschiede werden zwar statistisch nicht sig-

nifikant, decken sich jedoch in der Tendenz mit den Ergebnissen anderer Studien [8–10].

Einschränkend für die Interpretation der vorliegenden Ergebnisse muss die kleine Studienpopulation angeführt werden, die es u.a. nicht erlaubt, weitere Variablen aufzunehmen, um multivariate Berechnungen durchzuführen. Ebenfalls einschränkend wirkt sich die Befragungsmethode aus: Angaben zum Nikotinkonsum wurden nur über einen Elternfragebogen erhoben, die Zuverlässigkeit und Genauigkeit der Angaben zum Rauchverhalten während der Schwangerschaft ist daher zu hinterfragen. Darüber hinaus fehlen detaillierte Informationen, ob die Mutter während der Schwangerschaft und die Kinder nachgeburtlich passivem Nikotinkonsum ausgesetzt waren und wie sich die weiteren Entwicklungsbedingungen gestaltet haben.

### Schlussfolgerungen für die klinische Praxis

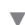

Aus den Befunden lassen sich Ansatzpunkte für Prävention und Intervention ableiten. Präventive Maßnahmen beziehen sich in erster Linie auf den Nikotinkonsum während der Schwangerschaft. In diesem Zusammenhang wäre es auch erforderlich, den Nikotinkonsum bereits bei der Betreuung der Schwangeren nicht nur als einfachen Risikofaktor, sondern differenziert auch hinsichtlich der täglichen Nikotindosis zu erfassen und die werdenden Mütter angemessen zu beraten. Die Bundeszentrale für gesundheitliche Aufklärung hat unter der Rubrik „Förderung des Nichtrauchens“ ([www.bzga.de](http://www.bzga.de)) verschiedene Broschüren für schwangere Frauen, Mütter und deren Partner herausgegeben, um aufzuklären und gleichzeitig dabei zu unterstützen, einen Weg zum Ausstieg aus dem Nikotinkonsum zu finden. Das Nationale Zentrum Frühe Hilfen (NZFH) stellt ebenfalls Unterstützungssysteme mit koordinierten Hilfsangeboten (wie Familienhebammen) für Eltern und Kinder zur Verfügung ([www.fruehehilfen.de](http://www.fruehehilfen.de)). Auch in den Bundesländern laufen verschiedene Projekte, die sich an Schwangere wenden; beispielhaft sei auf das Projekt PATERAS (Promotion of Smoking Cessation during Pregnancy and in the First Year after Birth) in Hamburg verwiesen [40]. Hier wäre es wichtig, dass auf die individuellen Bedingungen der werdenden Mutter zugeschnittene Präventionskonzepte einerseits zur Förderung des Nichtrauchens und andererseits zum Schutz vor Passivrauchen während der Schwangerschaft bundesweit thematisiert und entsprechend umgesetzt werden [41]. In gleichem Maße wäre es wichtig, dass sich entsprechende Aufklärungs- und Hilfsangebote nicht nur an Schwangere richten, sondern auch die Zeit nach der Geburt einschließen. Hier wäre zu prüfen, ob und in welcher Form Informationen über den Nikotinkonsum der Schwangeren (und ggf. des Partners) in Form eines Dokumentationsbogens oder eines Arztbriefs an den betreuenden Kinderarzt weitergegeben werden können. Als Grundlage für diese Kooperationen dient dabei das Gesetz zur Kooperation und Information im Kinderschutz vom 22. Dezember 2011 (BGBl. I S. 2975). Interventionsmaßnahmen, die sich auf die werdende Mutter beziehen, zeigen zumindest kurzfristige Effekte [42], werden aber insges. offensichtlich noch viel zu selten angeboten. Hinzu kommt, dass Frauen trotz aller Aufklärung immer wieder mit unterschiedlichen, sich widersprechenden Aussagen zum Rauchverhalten konfrontiert werden. Rasenack und Jähne [43] stellen in ihren Schlussfolgerungen verschiedene Maßnahmen zur Beratung schwangerer Frauen vor, die auch eine Verbesserung der suchtmmedizinischen Kompetenz des medizinischen Personals, insbesondere der Frauenärzte, beinhalten.

Betrachtet man die Ebene der Verhaltensprobleme der Kinder, konnte mehrfach bestätigt werden, dass sich verhaltenstherapeutische Maßnahmen positiv auf die exekutiven Funktionen und insbesondere auf die Inhibitionskontrolle auswirken [44]. Dabei spielt v.a. die Verbesserung der Selbstregulation und hier speziell der kognitiven Kontrolle eine große Rolle. Kognitive Kontrolle stellt ein Subsystem der Selbstregulation dar, das maßgeblich durch exekutive Funktionen definiert wird. Gawrilow und Kollegen [45] beschreiben, dass Trainings mit sogenannten Wenn-Dann-Plänen als Selbstregulationsstrategie und zur Reaktionsinhibition zu einer Verbesserung von Inhibitionsleistungen bei Kindern mit ADHS führen. Mit einer frühzeitigen Intervention können dann sekundäre Beeinträchtigungen im weiteren Entwicklungsverlauf v.a. im Rahmen des Schulunterrichts vermieden werden [46].

### Interessenkonflikt

▼  
Nein.

### Literatur

- Lampert T, von der Lippe E, Müters S. Verbreitung des Rauchens in der Erwachsenenbevölkerung in Deutschland. Bundesgesundheitsblatt 2013; 56: 802–808
- Kröger C, Mons U, Klärs G et al. Evaluation des Gesundheitsziels „Tabakkonsum reduzieren“. Bundesgesundheitsblatt Gesundheitsforschung Gesundheitsschutz 2010; 53: 91–102
- Schneider S, Maul H, Freerksen N et al. Who smokes during pregnancy? An analysis of the German Perinatal Quality Survey 2005. Public Health 2008; 122: 1210–1216
- Fleitmann S, Dohnke B, Balke K et al. Frauen und Rauchen. Bundesgesundheitsblatt Gesundheitsforschung Gesundheitsschutz 2010; 53: 117–124
- Scholz R, Voigt M, Schneider K et al. Analysis of the German Perinatal Survey of the years 2007–2011 and comparison with data from 1995–1997: Maternal characteristics. Geburtsh Frauenheilk 2013; 73: 1247
- Julvez J, Ribas-Fito N, Torrent M et al. Maternal smoking habits and cognitive development of children at age 4 years in a population-based birth cohort. Int J Epidemiol 2007; 36: 825–832
- Danielsson J, de Boer M, Petermann F et al. Nikotinexposition in der Schwangerschaft – Auswirkungen auf die kognitive Entwicklung im Kindergartenalter. Geburtsh Frauenheilk 2009; 69: 692–697
- Mund M, Louwen F, Klingelhofer D et al. Smoking and pregnancy—a review on the first major environmental risk factor of the unborn. Int J Environ Res Public Health 2013; 10: 6485–6499
- Koch S, Vilser C, Groß W et al. Rauchen während der Schwangerschaft – Risiko für intrauterine Wachstumsrestriktion und bleibende Kleinwüchsigkeit. Z Geburtshilfe Neonatol 2012; 216: 77–81
- Murphy DJ, Dunney C, Mullally A et al. Population-based study of smoking behaviour throughout pregnancy and adverse perinatal outcomes. Int J Environ Res Public Health 2013; 10: 3855–3867
- Knopik VS. Maternal smoking during pregnancy and child outcomes: Real or spurious effect? Dev Neuropsychol 2009; 34: 1–36
- Thakur GA, Sengupta SM, Grizenko N et al. Maternal smoking during pregnancy and ADHD: a comprehensive clinical and neurocognitive characterization. Nicotine Tob Res 2013; 15: 149–157
- Huijbregts SCJ, Séguin JR, Zoccolillo M et al. Associations of maternal prenatal smoking with early childhood physical aggression, hyperactivity-impulsivity, and their co-occurrence. J Abnorm Child Psychol 2007; 35: 203–215
- Piper BJ, Corbett SM. Executive function profile in the offspring of women that smoked during pregnancy. Nicotine Tob Res 2012; 14: 191–199
- Huijbregts SCJ, Warren AJ, de Sonneville LMJ et al. Hot and cool forms of inhibitory control and externalizing behavior in children of mothers who smoked during pregnancy: an exploratory study. J Abnorm Child Psychol 2008; 36: 323–333
- Clifford A, Lang L, Chen R. Effects of maternal cigarette smoking during pregnancy on cognitive parameters of children and young adults: a literature review. Neurotoxicol Teratol 2012; 34: 560–570
- Carlson SM. Developmentally sensitive measures of executive function in preschool children. Dev Neuropsychol 2005; 28: 595–616
- Sarsour K, Sheridan M, Jutte D et al. Family socioeconomic status and child executive functions: the roles of language, home environment, and single parenthood. J Int Neuropsychol Soc 2010; 17: 120–132
- Röthlisberger M, Neuenschwander R, Michel E et al. Exekutive Funktionen: Zugrundeliegende kognitive Prozesse und deren Korrelate bei Kindern im späten Vorschulalter. Z Entwicklungspsychol Pädagog Psychol 2010; 42: 99–110
- Neuenschwander R, Röthlisberger M, Cimeli P et al. How do different aspects of self-regulation predict successful adaptation to school? J Exp Child Psychol 2012; 113: 353–371
- Jednoróg K, Altarelli I, Monzalvo K et al. The influence of socioeconomic status on children's brain structure. PLoS One 2012; 7: e42486
- Daseking M, Petermann F. Verhaltensinventar zur Beurteilung exekutiver Funktionen für das Kindergartenalter (BRIEF-P). Deutschsprachige Adaptation des Behavior Rating Inventory of Executive Function – Preschool Version (BRIEF-P) von G. A. Gioia, K. A. Espy & P. K. Isquith. Bern: Huber; 2013
- Gioia GA, Espy KA, Isquith PK. Behavior Rating Inventory of Executive Function – Preschool version (BRIEF-P). Odessa, FL: PAR; 2003
- Barkley RA. Behavioral inhibition, sustained attention, and executive functions: constructing a unifying theory of ADHD. Psychol Bull 1997; 121: 65–94
- Willcutt EG, Doyle AE, Nigg JT et al. Validity of the executive function theory of attention-deficit/hyperactivity disorder: a meta-analytic review. Biol Psychiatry 2005; 57: 1336–1346
- Sonuga-Barke EJ, Dalen L, Daley D et al. Are planning, working memory, and inhibition associated with individual differences in preschool ADHD symptoms? Dev Neuropsychol 2002; 21: 255–272
- Skogan AH, Zeiner P, Egeland J et al. Inhibition and working memory in young preschool children with symptoms of ADHD and/or oppositional-defiant disorder. Child Neuropsychol 2014; 20: 607–624
- Roberts BA, Martel MM, Nigg JT. Are there executive dysfunction subtypes within ADHD? J Atten Disord 2013; DOI: 10.1177/1087054713510349
- Thapar A, Rice F, Hay D et al. Prenatal smoking might not cause attention-deficit/hyperactivity disorder: evidence from a novel design. Biol Psychiatry 2009; 66: 722–727
- Nigg JT, Nikolas M, Mark Knottnerus G et al. Confirmation and extension of association of blood lead with attention-deficit/hyperactivity disorder (ADHD) and ADHD symptom domains at population-typical exposure levels. J Child Psychol Psychiatry 2010; 51: 58–65
- Millenet S, Hohmann S, Poustka L et al. Risikofaktoren und frühe Vorläufersymptome der Aufmerksamkeitsdefizit-/Hyperaktivitätsstörung (ADHS). Kindh Entwickl 2013; 22: 201–208
- Slotkin TA, Card J, Stadler A et al. Effects of tobacco smoke on PC12 cell neurodifferentiation are distinct from those of nicotine or benzo [a]pyrene. Neurotoxicol Teratol 2014; 43: 19–24
- Rauh VA, Horton MK, Miller RL et al. Neonatology and the environment: early exposure to airborne environmental toxicants. Neoreviews 2010; 11: e363–e369
- Wessels C, Winterer G. Nikotin und Gehirnentwicklung. Nervenarzt 2008; 79: 7–16
- Dwyer JB, McQuown SC, Leslie FM. The dynamic effects of nicotine on the developing brain. Pharmacol Ther 2009; 122: 125–139
- Dani JA. Overview of nicotinic receptors and their roles in the central nervous system. Biol Psychiatry 2001; 49: 166–174
- Azam L, Chen Y, Leslie FM. Developmental regulation of nicotinic acetylcholine receptors within midbrain dopamine neurons. Neurosci 2007; 144: 1347–1360
- Steinmann E, Siniatchkin M, Petermann F et al. ADHS im Kindesalter: ätiologische und therapeutische Ansätze mit dem Schwerpunkt der Bildgebung. Z Neuropsychol 2012; 23: 193–203
- Chen R, Clifford A, Lang L et al. Is exposure to secondhand smoke associated with cognitive parameters of children and adolescents?—a systematic literature review. Ann Epidemiol 2013; 23: 652–661
- Krug B, Haasen C, Schlankardt M. PATERAS – ein Hamburger Praxisprojekt zur Förderung des Nichtrauchens in Schwangerschaft und Säuglingszeit. Suchttherapie 2008; 9: 22–25
- Fleitmann S, Dohnke B, Balke K et al. Frauen und Rauchen. Bundesgesundheitsblatt 2010; 53: 117–124
- Nuesslein TG, Struwe A, Maiwald N et al. Mütterlicher Tabakkonsum lässt sich durch einfache Intervention des Kinderarztes reduzieren. Klin Padiatr 2006; 218: 283–286



- 43 *Rasenack R, Jähne A.* Tabakkonsum und Tabakentwöhnung in der Schwangerschaft. *Sucht* 2010; 56: 183–196
- 44 *Toussaint A, Petermann F, Schmidt S et al.* Wirksamkeit verhaltenstherapeutischer Maßnahmen auf die Aufmerksamkeits- und Exekutivfunktionen bei Kindern und Jugendlichen mit ADHS. *Z Klin Psychol Psychiatr Psychother* 2011; 59: 25–36
- 45 *Gawrilow C, Schmitt K, Rauch W.* Kognitive Kontrolle und Selbstregulation bei Kindern mit ADHS. *Kindh Entwickl* 2011; 20: 41–48
- 46 *Gawrilow C, Petermann F, Schuchardt K.* ADHS im Vorschulalter. *Kindh Entwickl* 2013; 22: 189–192
